## RESEARCH ARTICLE

# Modelling the historical distribution of schistosomiasis-transmitting snails in South Africa using ecological niche models

Nisa Ayob<sup>1\*</sup>, Roelof P. Burger<sup>2</sup>, Monray D. Belelie<sup>2</sup>, Ncobile C. Nkosi<sup>1</sup>, Henno Havenga<sup>2</sup>, Lizaan de Necker<sup>3,4</sup>, Dirk P. Cilliers<sup>2</sup>

**1** Unit for Environmental Sciences and Management, North-West University, Mafikeng Campus, Mafikeng, South Africa, **2** Unit for Environmental Sciences and Management, North-West University, Potchefstroom Campus, Potchefstroom, South Africa, **3** South African Institute for Aquatic Biodiversity (NRF-SAIAB), Makhanda, South Africa, **4** Water Research Group, Unit for Environmental Sciences and Management, North-West University, Potchefstroom, South Africa

✉ These authors contributed equally to this work.

\* [23799110@nwu.ac.za](mailto:23799110@nwu.ac.za)

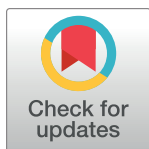

## OPEN ACCESS

**Citation:** Ayob N, Burger RP, Belelie MD, Nkosi NC, Havenga H, de Necker L, et al. (2023) Modelling the historical distribution of schistosomiasis-transmitting snails in South Africa using ecological niche models. PLoS ONE 18(11): e0295149. <https://doi.org/10.1371/journal.pone.0295149>

**Editor:** Jay Richard Stauffer, Jr., Penn State University, UNITED STATES

**Received:** April 25, 2023

**Accepted:** November 14, 2023

**Published:** November 30, 2023

**Copyright:** © 2023 Ayob et al. This is an open access article distributed under the terms of the [Creative Commons Attribution License](https://creativecommons.org/licenses/by/4.0/), which permits unrestricted use, distribution, and reproduction in any medium, provided the original author and source are credited.

**Data Availability Statement:** <https://cds.climate.copernicus.eu/cdsapp#!/dataset/sis-biodiversity-era5-global?tab=form>.

**Funding:** The financial assistance of the Water Research Commission (WRC) is acknowledged for research and project funding (Project No C2019/2020-00151). L.d.N. hereby acknowledges funding from the National Research Foundation (NRF)-Department of Science and Innovation (DSI) Professional Development Programme (Grant UID 127549) and the use of infrastructure and

## Abstract

Schistosomiasis is a vector-borne disease transmitted by freshwater snails and is prevalent in rural areas with poor sanitation and no access to tap water. Three snail species are known to transmit schistosomiasis in South Africa (SA), namely *Biomphalaria pfeifferi*, *Bulinus globosus* and *Bulinus africanus*. In 2003, a predicted prevalence of 70% was reported in tropical climates in SA. Temperature and rainfall variability can alter schistosomiasis-transmitting snails' development by increasing or decreasing their abundance and geographical distribution. This study aimed to map the historical distribution of schistosomiasis from 1950 to 2006 in SA. The snail sampling data were obtained from the historical National Snail Freshwater Collection (NFSC). Bioclimatic variables were extracted using ERA 5 reanalysis data provided by the Copernicus Climate Change Service. In this study, we used 19 bioclimatic and four soil variables. The temporal aggregation was the mean climatological period pre-calculated over the 40-year reference period with a spatial resolution of 0.5° x 0.5°. Multicollinearity was reduced by calculating the Variance Inflation Factor Core (VIF), and highly correlated variables (> 0.85) were excluded. To obtain an "ensemble" and avoid the integration of weak models, we averaged predictions using the True Skill Statistical (TSS) method. Results showed that the ensemble model achieved the highest Area Under the Curve (AUC) scores (0.99). For *B. africanus*, precipitation-related variables contributed to determining the suitability for schistosomiasis. Temperature and precipitation-related variables influenced the distribution of *B. globosus* in all three models. *Biomphalaria pfeifferi* showed that Temperature Seasonality (bio4) contributed the most (47%) in all three models. According to the models, suitable areas for transmitting schistosomiasis were in the eastern regions of South Africa. Temperature and rainfall can impact the transmission and distribution of schistosomiasis in SA. The results will enable us to develop future projections for *Schistosoma* in SA based on climate scenarios.

equipment provided by the NRF-SAIAB Research Platform and the funding channelled through the NRF-SAIAB Institutional Support system. The funders had no role in the study design, data collection and analysis, decision to publish, or preparation of the manuscript.

**Competing interests:** The authors have declared that no competing interests exist.

## Introduction

Schistosomiasis is a parasitic infection from infestation by trematode worms belonging to the genus *Schistosoma* [1]. This disease is spread through vectors and is most common in 78 countries, mainly tropical and subtropical regions. After malaria, schistosomiasis is the second most impactful disease regarding socioeconomic impact on affected individuals [1–3]. Sub-Saharan Africa is one of the most endemic areas for this disease, with 800 million people infected and 200 to 535 thousand deaths annually [3]. Schistosomiasis is widespread due to unsanitary conditions, inadequate sanitation, and a lack of clean water [4]. Among poor rural populations, most cases are linked to agriculture and fishing [5]. During their daily activities, fishermen and farmers are in contact with snail-infested water, making them susceptible to schistosomiasis [6]. Communities that do not have access to tap water are more likely to contract the disease since they travel to snail-infested water sources for domestic activities such as laundry, bathing, and cooking [5]. Freshwater snails are the intermediate hosts that transmit schistosomiasis to people and livestock. The main parasites known to infect humans are *Schistosoma haematobium* and *Schistosoma mansoni* [6]. *Schistosoma haematobium*, causing urogenital schistosomiasis, and is transmitted by *B. globosus* and *B. africanus*. *Schistosoma mansoni* causes rectal and intestinal schistosomiasis, affecting the intestines and transmitted by *B. pfeifferi*. The parasites commonly inhabit areas where domestic and agricultural activities occur.

Approximately 5 million South Africans living in poor rural areas lack access to clean water [7]. In rural areas without running water, communities near water bodies (rivers, ponds, lakes, and dams) often become infected with schistosomiasis [8]. The prevalence of schistosomiasis ranges between 7.7% and 70% among school-going children, who appear to have the highest prevalence of this infection [8, 9]. Schistosomiasis occurs in areas where snail vectors have suitable habitats. The suitable habitats where the snail vectors thrive are tropical, humid, and aquatic environments such as dams and rivers [10]. These intermediate host snails thrive in regions with mild to warm temperatures (15–25°C) and moderate to heavy rainfall events (300–900mm/a) [10, 11]. The most prevalent geographical areas in SA include the majority of Mpumalanga, Limpopo and the coast of KwaZulu-Natal and the eastern regions of Gauteng and North West provinces [11–14]. Although intermediate host snails reproduce through aestivating during dry seasons, snails are limited to areas with enough humidity for survival [14].

During the past decade, climate variability has led to increasing schistosomiasis cases in Africa, with an estimated 90% of infections [15]. In addition, studies suggest that temperature and precipitation have contributed to changes in water availability [16, 17]. As temperatures increase, the water in waterbodies can become stagnant and provide a breeding ground for the parasites that cause the disease [16–18]. Shifts in precipitation patterns, rising temperatures, frequent droughts and floods may impact the intermediate host snails [17–19]. As environmental conditions become favourable, parasites and snails can spread into areas that were not previously endemic [20]. Climate variability can affect water flow, temperature, and precipitation, which affect vectors' behavioural and geographical patterns [16]. *Bulinus africanus* is primarily distributed in the eastern regions of SA, while *B. globosus* is prevalent in the northeastern areas of Limpopo and Mpumalanga. Due to its sensitivity, *B. pfeifferi* is unlikely to be present in temporary rainy habitats [21]. These species typically live in still or slow-moving permanent waterbodies. Similar to *B. africanus*, *B. pfeifferi* distribution covers most of SA and is influenced by the water quality of water bodies and temperature [22]. De Kock et al. [23] studied *Bulinus* species distribution and habitats in SA using decision trees and found that temperature is the most crucial factor determining the geographic range for *B. africanus*. It was supported by Brown's findings [24], showing that *B. africanus* is associated with cooler weather than *B. globosus*.

In recent years, ecological niche modelling (ENM) has become increasingly popular [25–27]. In addition to predicting distributional ranges, the model can identify which climatic and environmental variables shape the distribution of species [26]. Ecological niche modelling has many approaches, each producing a unique prediction and map using bioclimatic data [26, 28–30]. Studies in SA have previously applied the ENMs [31] and China [32] to estimate snail habitats as intermediate hosts for schistosomiasis transmission. However, no single approach is most effective for modelling the distribution of schistosomiasis, as discussed by [33, 34].

In SA and Ethiopia, urogenital schistosomiasis is more common due to cooler climates than in other African countries [4]. South Africa is among the most vulnerable countries in the world owing to these climatic changes, especially given the high incidence of several life-threatening diseases, poverty, and unequal access to health care. Schistosomiasis may spread to previously unaffected areas with the spread of *Schistosoma* parasites in warmer waters [5, 9, 35]. Climate change alters distribution patterns and the geographical distribution of schistosomiasis [20]. There have been few attempts to model the historical distributions of *Schistosoma* transmitting snails in SA using environmental variables. Therefore, this study aimed to use ecological niche models (ENMs) to simulate historical distributions of infected snails in SA to fill this knowledge gap. In this paper, we modelled all three vectors of schistosomiasis: *B. africanus*, *B. globosus* and *B. pfeifferi*. These maps will enable us to accurately forecast the spread of schistosomiasis in South African endemic areas and aid in strategically planning preventive measures.

## Materials and methods

### Study area

South Africa's surface area covers 1 219 602 km<sup>2</sup>. It extends along its latitudes from 22°S to 35°S as well as along its longitudinal axis from 17°E to 33°E [36, 37] (Fig 1). From the 1950s to 2006, snails infected with parasites were historically sampled from rivers and dams in SA. The country receives about 464 mm of rainfall annually [36]. Rainfall patterns are changing, resulting in severe storms, landslides, and flash flooding in the eastern regions of SA. Studies have shown that floods can lead to schistosomiasis outbreaks [38, 39]. During floods, people are exposed to contaminated water, increasing their risk of schistosome infection. Temperatures in SA have increased steadily over the last 60 years, impacting the survival and distribution of intermediate host snails [40–42]. A study conducted in Limpopo Province found that winters are becoming wetter and warmer, and summers are getting drier and warmer [43]. A typical summer temperature in SA ranges from 15°C to 36°C and a winter temperature of -2°C to 26°C [36, 40]. As temperatures increase, people with inadequate housing and access to clean water will likely become more vulnerable to schistosomiasis.

### Occurrence data

The occurrence data were obtained from the historical National Snail Freshwater Collection (NFSC) from 1950 to 2006, and 15303 records were recorded. The occurrence dataset for *B. africanus*, *B. globosus* and *B. pfeifferi* is illustrated in Table 1. The original sampling points were stored in quarter-degree grids. The snail sampling points were refined by digitising based on the descriptions of the sampling points on a 1:50000 topographical scale using ArcGis 10.8.2. The locations were digitised close to waterbodies (dams, rivers, reservoirs, lakes and swamps). Latitude and longitude coordinates were stored in decimal degrees using a WGS84 datum. South African administrative boundaries and hydrological data were downloaded from DIVA-GIS (<https://www.diva-gis.org/gdata>). The African shapefile was downloaded from Natural Earth (<https://www.naturalearthdata.com/>).

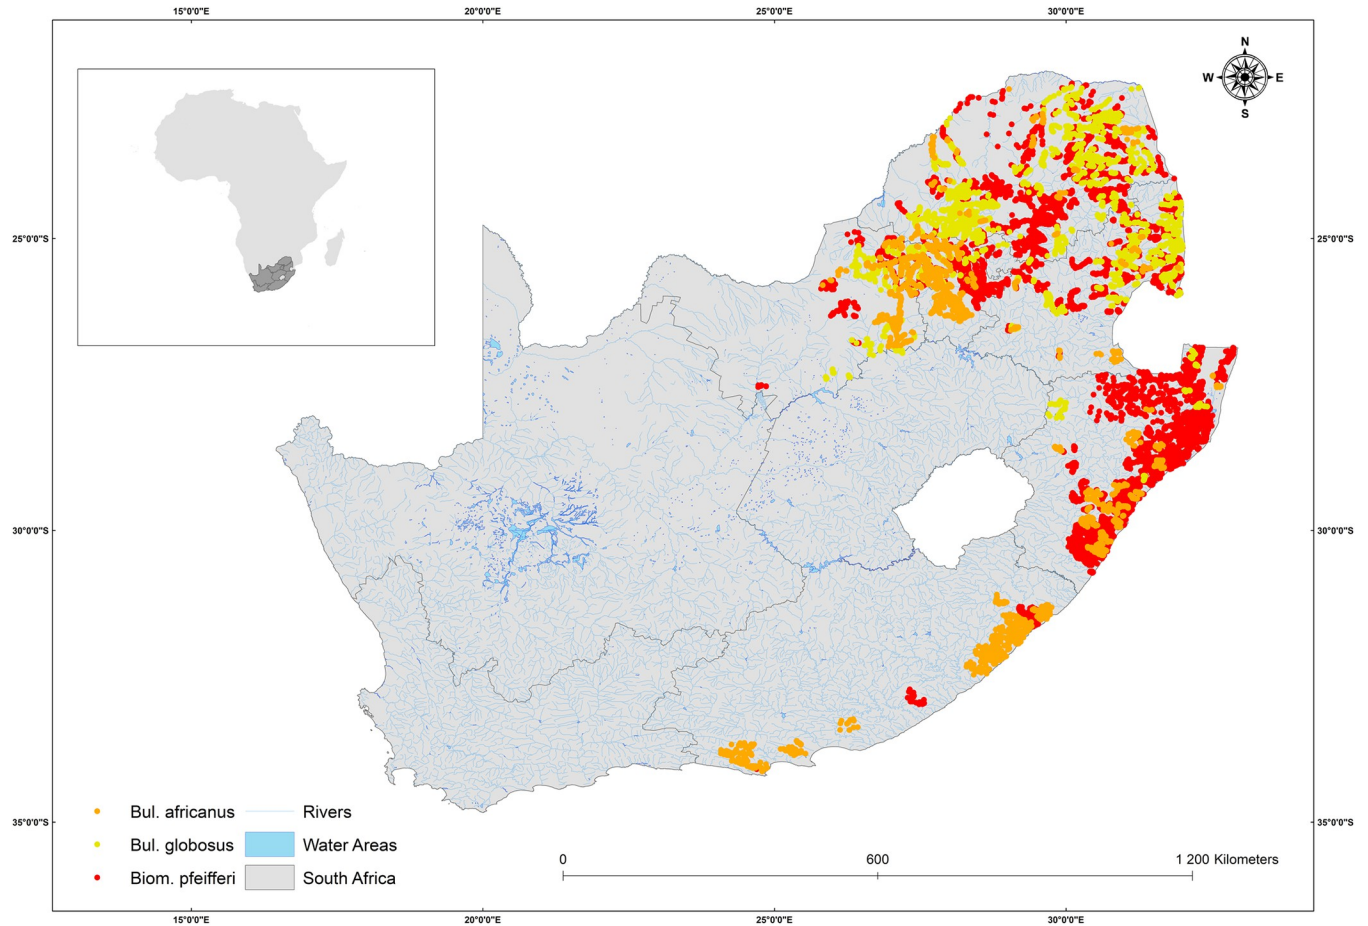

**Fig 1. Map of South Africa illustrating snail vectors of schistosomiasis species.** The orange points show *B. africanus*, the yellow depicts *B. globosus*, and the red represents *B. pfeifferi*.

<https://doi.org/10.1371/journal.pone.0295149.g001>

### Environmental variables

From 1970 to 2018, bioclimatic variables were extracted using ERA 5 reanalysis data provided by the Copernicus Climate Change Service. This study used 19 bioclimatic and four soil variables from 1970 to 2006. These indicators describe how climate affects species’ habitats and can be used for biodiversity applications. The temporal aggregation was the mean climatological period pre-calculated over the 40-year reference period 1979–2018 with a spatial resolution of 0.5° x 0.5°. The data was downloaded as NetCDF-4 files and was converted to a raster using multidimensional tools in ArcGIS 10.8.2. The data were prepared in ArcGIS and RStudio 4.2.1.

**Table 1. The number of historical data points for snail vectors of schistosomiasis species found in South Africa from 1950–2006.**

| Species                       | Occurrence Points |
|-------------------------------|-------------------|
| <i>Bulinus africanus</i>      | 3051              |
| <i>Bulinus globosus</i>       | 3153              |
| <i>Biomphalaria pfeifferi</i> | 9166              |

<https://doi.org/10.1371/journal.pone.0295149.t001>

**Table 2. The selection of bioclimatic variables for the ecological models based on their VIF values.**

| Species             | Variable                                  | Description                                 | VIF |
|---------------------|-------------------------------------------|---------------------------------------------|-----|
| <i>B. africanus</i> | Bio 3                                     | Isothermality                               | 9.1 |
|                     | Bio 5                                     | Max temperature of the warmest month        | 4.0 |
|                     | Bio 8                                     | Precipitation of the wettest month          | 4.1 |
|                     | Bio 13                                    | Precipitation seasonality                   | 5.5 |
|                     | Bio 15                                    | Precipitation of the wettest quarter        | 6.6 |
|                     | Bio 16                                    |                                             | 7.4 |
|                     | Soil water volume for the wettest quarter |                                             | 9.0 |
|                     | Soil water volume for the coldest quarter |                                             | 6.3 |
|                     | Soil water for the warmest quarter        |                                             | 5.5 |
| <i>B. globosus</i>  | Bio 4                                     | Temperature seasonality                     | 3.9 |
|                     | Bio 7                                     | Temperature Annual Range                    | 3.1 |
|                     | Bio 8                                     | The mean temperature of the wettest quarter | 3.8 |
|                     | Bio 15                                    | Precipitation seasonality                   | 3.2 |
|                     | Bio 16                                    | Precipitation of the wettest quarter        | 5.8 |
|                     | Bio 17                                    | Precipitation of the driest quarter         | 5.7 |
|                     | Soil water for the warmest quarter        | 1.7                                         |     |
| <i>B. pfeifferi</i> | Bio 4                                     | Temperature seasonality                     | 6.9 |
|                     | Bio 8                                     | The mean temperature of the wettest quarter | 3.2 |
|                     | Bio 12                                    | Annual precipitation                        | 7.3 |
|                     | Bio 16                                    | Precipitation of the wettest quarter        | 9.2 |
|                     | Bio 18                                    | Precipitation of the warmest quarter        | 3.1 |

<https://doi.org/10.1371/journal.pone.0295149.t002>

### Selection of environmental variables

A group of variables was chosen based on bioclimatic and soil factors to minimise collinearity in the dataset shown in Table 2. The *USD M* R package calculated the Variance Inflation Factor Core (VIF). This analysis measures the strength of the relationship between each predictor and the rest. In VIFs, the multiple correlation coefficients ( $R^2$ ) are obtained by performing a regression analysis of each predictor variable against the other variables in the model. As a rule of thumb, a  $VIF > 10$  indicates a collinearity problem [44]. All the variables  $> 10$  were removed from the dataset using a threshold (th) of 0.85. The VIF is calculated by excluding highly correlated variables through a stepwise procedure Table 2. During the VIF calculation process, the algorithm looks for variables with a linear correlation exceeding the predefined th value. It was done for the averages over the period 1970–2006. The process was repeated until none of the variables had a high correlation coefficient ( $r$ ). To determine VIF, a linear regression model was employed, where the numerical variable of interest was utilised as the response variable Eq (1). The final set of bioclimatic predictors is illustrated in Table 2. It must be noted that, due to the nature and distribution of the species, each species has a unique set of environmental variables.

$$VIF = \frac{1}{1 - R_i^2} \quad (1)$$

Where  $R^2$ , represents the linear model's regression coefficient.

### Modelling procedures and data analysis

Three ENMs were applied in this study to overcome their limitations: Generalized Linear Model (GLM), Maximum Entropy (MaxEnt) and Random Forest (RF), as illustrated in Table 3. This study chose logistic regression since it is the most widely used GLM form for environmental modelling. MaxEnt estimates the distribution within the investigation area based on the current locations' environmental conditions. Using the distribution area, it selects

**Table 3. GLM, RF, and MaxEnt characteristics used in the SDM.**

| ENM    | Method              | Format                   | Reference |
|--------|---------------------|--------------------------|-----------|
| GLM    | Regression analysis | Presence/Pseudo-absence  | [47]      |
| RF     | Regression analysis | Presence/Pseudo-absence  | [48]      |
| MaxEnt | Maximum Entropy     | Presence/ Pseudo-absence | [25]      |

<https://doi.org/10.1371/journal.pone.0295149.t003>

an area with the maximum entropy [45]. RF consists of each tree constructed using a random subset of predictor variables. As a result, decor-related trees are created and reduce the model variance [46–48].

The present study is based on a multi-model SDM approach [49] implemented in the SDM package, and *dismo* was used to examine and model species distribution [49]. This R package unifies different implementations of SDM into one object-oriented framework that is reproducible and extensible. Based on the methodology of [50], the occurrence data were divided into two groups. Models were evaluated using 70% training data and 30% test data. The analysis was conducted with 5000 random pseudo-absence points. While presence-only models are commonly used, ENM model evaluations show that presence-background techniques are more efficacious [51]. To evaluate the stability and accuracy of the models, the number of maximum iterations was increased to 5,000 iterations using subsets to reduce underestimations and overestimations. By doing so, the model will have adequate time to converge. The regularisation remained at 1 to reduce model overfitting [51, 52].

Higher values in the area under the curve (AUC), Relative Operating Characteristics (ROC) and True Skill Statistics (TSS) indicated a better performance [53] in evaluating the model's predictions. Known as the Hanssen Kuipers Discriminator, TSS compares the number of actual positive forecasts to the number of correct hypothetical projections. It is pertinent to note that TSS includes omissions and commissions. A value of +1 indicates accurate classification. In contrast, a value of -1 indicates no better performance than random. AUC can be used to calculate ROC values. Random predictions are represented by 0.5, and predictions > 0.5 are better than the random model [54, 55]. The AUC values analyse the presence and absence of data across a range of thresholds. There are four levels of AUC: 0 (unsuitable), 0.7–0.8 (suitable), 0.8–0.9 (highly suited) and >0.9 (extremely suited) [53].

Based on the results of three models, an ensemble model was developed to model the distribution of schistosomiasis in SA. Ensemble models combine all algorithms, which improves performance [53, 56]. All the models generated TSS, as shown in Table 4. Based on this, to

**Table 4. AUC and TSS for *B. africanus*, *B. globosus* and *B. pfeifferi* for the different models used in this study.**

| Species                       | Model    | AUC  | TSS  |
|-------------------------------|----------|------|------|
| <i>Bulinus africanus</i>      | GLM      | 0.87 | 0.7  |
|                               | MaxEnt   | 0.95 | 0.77 |
|                               | RF       | 0.95 | 0.93 |
|                               | Ensemble | 0.99 | 0.95 |
| <i>Bulinus globosus</i>       | GLM      | 0.94 | 0.78 |
|                               | MaxEnt   | 0.95 | 0.79 |
|                               | RF       | 0.98 | 0.89 |
|                               | Ensemble | 0.99 | 0.94 |
| <i>Biomphalaria pfeifferi</i> | GLM      | 0.92 | 0.73 |
|                               | MaxEnt   | 0.93 | 0.75 |
|                               | RF       | 0.97 | 0.83 |
|                               | Ensemble | 0.99 | 0.94 |

<https://doi.org/10.1371/journal.pone.0295149.t004>

create an ensemble, all three models were combined using "Weighted averaging" by using the TSS that was  $> 0.75$  [56]. The weighted averaging gives more weight to the model with higher accuracy than other techniques.

## Results and discussion

### Performance of the models

Table 4 illustrates the AUC and TSS values for the different models and species. All three models had significant AUC and TSS values, demonstrating excellent performance. The RF outperformed the other models in terms of model performance across different species, followed by MaxEnt and GLM. The results of Wouyou et al. [55] were similar, with RF outperforming four ecological models.

Results showed that the ensemble models achieved the highest AUC scores (0.99) among the three ENM models. Evaluation of the model showed that it was based on competence rather than chance in modelling the historical distribution of schistosomiasis. It must be noted that the high AUC value provides confidence that the ensemble model can be used to examine schistosomiasis-prone areas under current and future climates.

Figs 2–4 illustrate ROC plot graphs for *B. africanus*, *B. globosus* and *B. pfeifferi*. These figs show a range of threshold probability values for the True Positive Rate (sensitivity) and False Positive Rate (1-specificity) on the Y-axis. The closer ROC follows sensitivity, the more AUC will have a larger area. A ROC curve that follows the Y-axis closely, the AUC has a larger size. Thus, the model will be more accurate. A random model or guess will result in a point along the grey-dotted diagonal line. The results showed that the average ROC scores for GLM, MaxEnt and RF performed well, with all the models averaging an ROC score  $\geq 0.89$ . For all three models, RF performed the most accurately (1), followed by MaxEnt (0.93) and GLM (0.9). This indicates that RF is the most accurate model for predicting species occurrence. Furthermore, the high AUC scores suggested that the models can be used to predict species occurrence with a high degree of confidence.

All three models performed well in the historical distribution areas of *B. africanus*, *B. globosus* and *B. pfeifferi*. Based on its accuracy in determining species distribution limits, the RF model performed better than MaxEnt and GLM. The RF model produced the most accurate results than the ensemble model. The results from the present study were similar to those [57]. They found RF, followed by MaxEnt, the best model for modelling Egypt's medicinal species. The results from the current study were like those obtained by [58] when they compared ENMs Genetic Algorithm for Rule Set Production (GARP), MaxEnt, and GLM. MaxEnt was not considered the most effective model based on performance in this study. Nevertheless, it is widely acknowledged to have a robust predictive capability in conservation studies [57, 59–61].

### Variable contribution to the different models

Among the three models that modelled *B. africanus*, precipitation-related variables had the greatest influence on the suitability for schistosomiasis, indicating that most *B. africanus* species thrive in rainfall environments, as shown by the response curves (Fig 5) and in (S1–S3 Figs). De Kock et al. [11] concluded that most *B. africanus* species occur in regions with 300 mm–700 mm/a of rainfall. For the GLM and MaxEnt, precipitation for the wettest quarter (bio16) (November to January) and precipitation for the wettest month (bio13) accounted for 65% in determining the suitability of schistosomiasis. Soil water for the wettest quarter contributed (32%) to the suitability for schistosomiasis. A study by Adekiya et al. [16] found that rainfall patterns are associated with the prevalence of schistosomiasis. Moderate precipitation

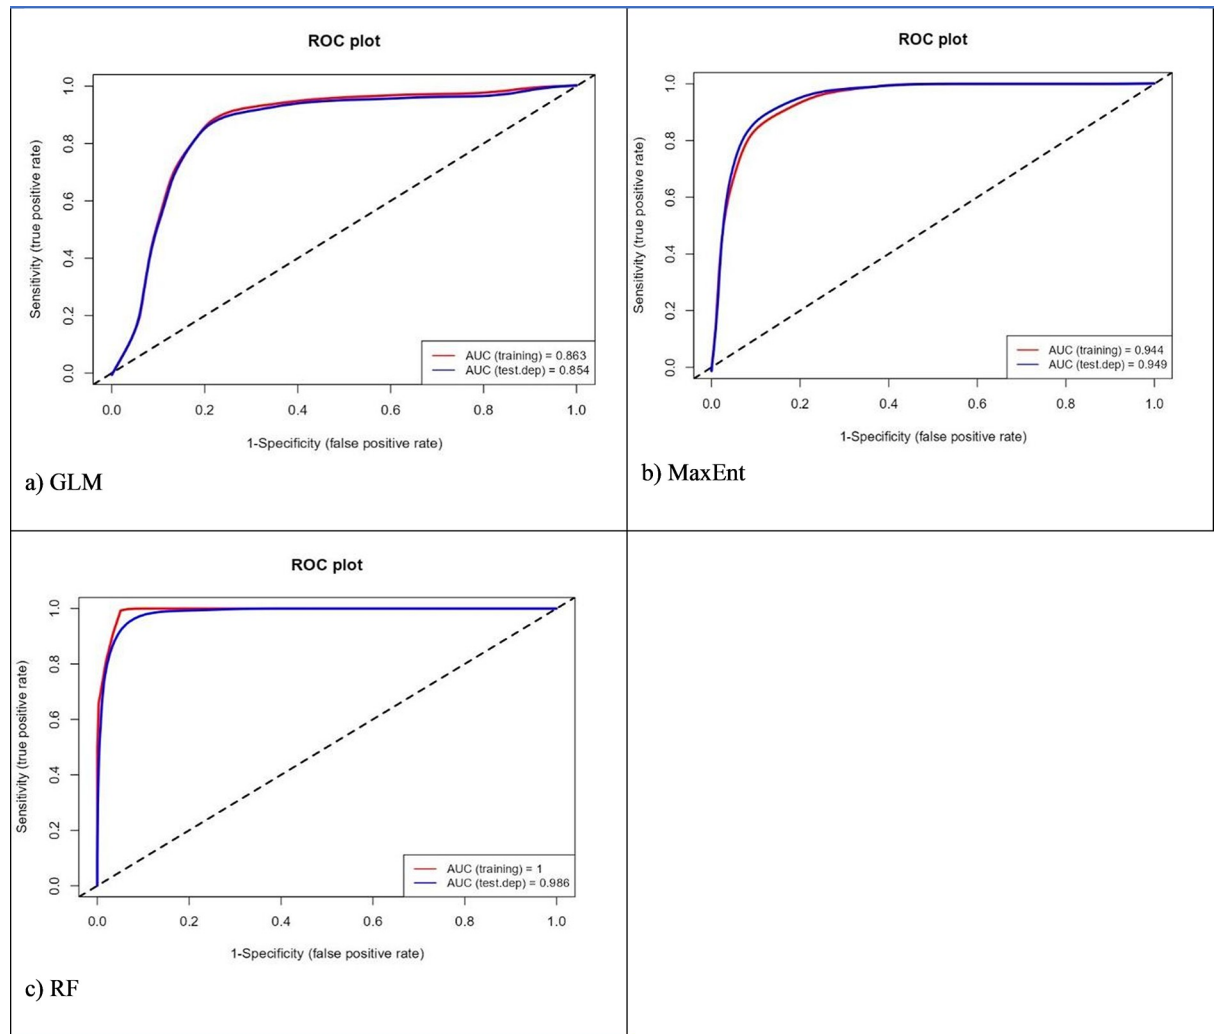

**Fig 2.** Area under the curve and Relative Operating Characteristics for *B. africanus* using three different models, namely (A) GLM, (B) MaxEnt, and (C) RF.

<https://doi.org/10.1371/journal.pone.0295149.g002>

allows for the transportation of snails and supports the creation of new habitats and temporary snail habitats [62]. Temperature variables contributed 59% to schistosomiasis suitability. *Bulinus africanus* is better adapted to colonising cooler environments. Appleton [63] concluded that cooler temperatures contributed the most to *B. africanus*. De Kock et al. [64] found that the optimal temperature for *B. africanus* reproduction was between 23°C and 26°C. Based on these results, *B. africanus* survived the longest at lower temperatures. Isothermality (bio3) (6.1%) did not affect schistosomiasis suitability. In the RF model, bio 16 accounted for 35.5%, followed by soil water (32%). Combined temperature variables contributed 31.9%, while the mean temperature of the wettest quarter (bio8) contributed 13.3% to the suitability of schistosomiasis in SA. This indicates that *B. africanus* thrive in both cold and warm climates. Thus, *B. africanus* suitability depends primarily on precipitation, temperature, and seasonal variations rather than annual averages. This is because the environment in SA varies significantly from season to season, and the parasites that cause schistosomiasis require specific conditions to survive and thrive [65, 66]. Thus, precipitation, temperature, and seasonality are critical factors in determining the suitability of the environment for these parasites.

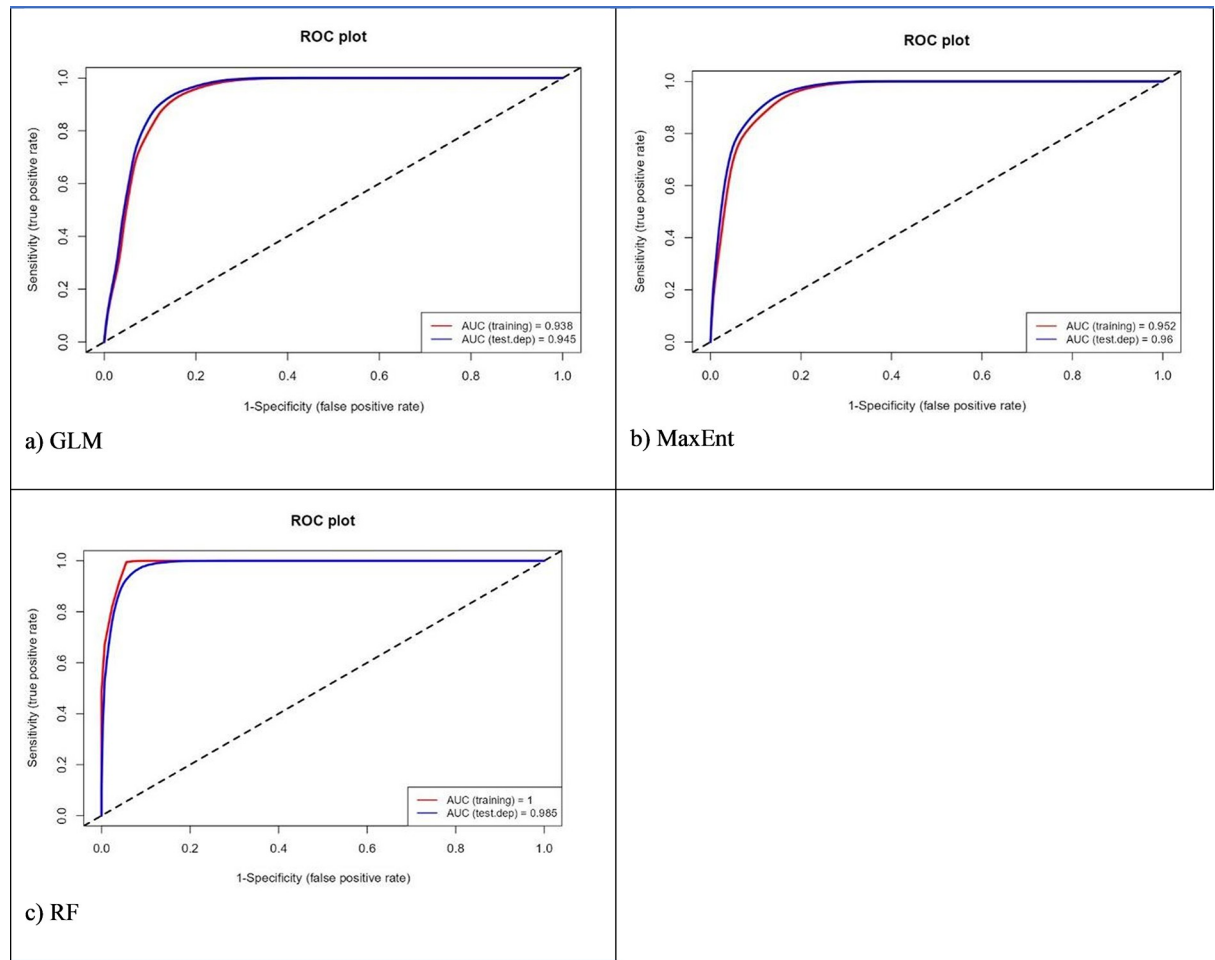

**Fig 3.** Area under the curve and Relative Operating Characteristics for *B. globosus* using three different models, namely (A) GLM, (B) MaxEnt, and (C) RF.

<https://doi.org/10.1371/journal.pone.0295149.g003>

*Bulinus globosus* distribution is significantly influenced by temperature and precipitation variables in all three models, as shown in (S4–S6 Figs). *Bulinus globosus* accounted for 41.7% of the suitability of infected snails by using precipitation in the driest quarter (bio17) and bio16, as shown in (Fig 6). A study by Pennance et al. [67] found that schistosomiasis-transmitting snails are more abundant during post-rainy seasons and more likely to transmit the disease. Madsen et al. [8] conducted a study on schistosomiasis along the lake shore of Malawi and reported that *B. globosus* is prevalent in post-rainy seasons or early winter. Due to bio16, heavy rainfall can cause floods, resulting in snail species migrating to new habitats. Therefore, potential habitats are created, allowing schistosomiasis-transmitting snails to migrate actively to nearby favourable habitats [68]. Temperature-related variables accounted for 38.3% of snail suitability. Similarly, *B. africanus*, bio 8 contributed the most (19.8%), followed by the annual temperature range (bio7) (Max Temperature of Warmest Month—Min Temperature of Coldest Month) (9.3%). The response curves for *B. globosus* show an increasing trend in bio8 (Fig 6). Therefore, *B. globosus* prefers hotter conditions with less moderate rain than *B. africanus*. In the MaxEnt model, temperature variables were the major contributors to *B. globosus*' suitability. Bio7 contributed 22.6%, followed by bio18 (18.4%). In contrast, Qin et al. [69] studied *Thuja sutchuenensis* and found that bio18 was the most suitable, followed by bio14 and bio6.

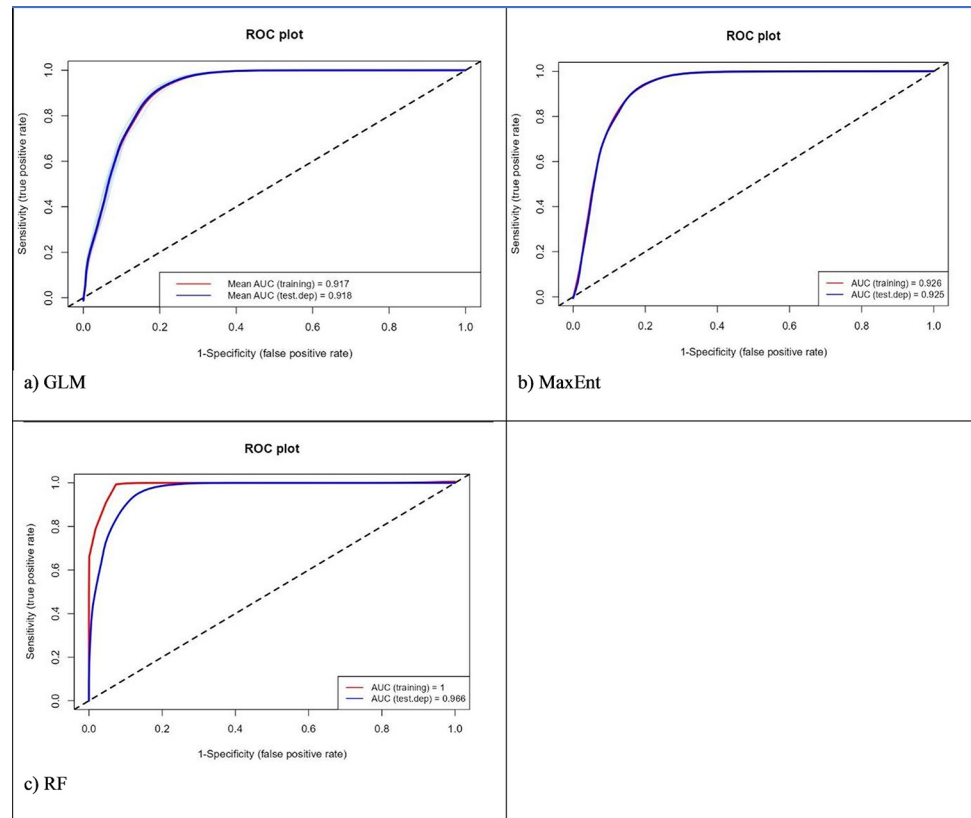

**Fig 4.** Area under the curve and Relative Operating Characteristics for *B. pfeifferi* uses three different models, namely (A) GLM, (B) MaxEnt, and (C) RF.

<https://doi.org/10.1371/journal.pone.0295149.g004>

According to the results from the current study, Similar to GLM and MaxEnt, the temperature annual range in the RF was the most influential variable in determining the suitability for *B. globosus*. A study by Joubert et al. [70] concluded that *B. globosus* is more resistant to high temperatures than *B. africanus*. There has been an increase in temperatures in SA, especially in tropical areas like Limpopo and Mpumalanga. Consequently, it could lead to an increase in the abundance of *B. globosus* species in the future. Joubert et al. [70] showed that *B. globosus* could withstand temperatures (34° to 40°C). Schiff et al. [71] concluded that *B. globosus* could survive in thermally harsh environments as they are relatively high in increasing temperatures.

In modelling *B. pfeifferi*, results showed that temperature seasonality (bio4) (standard deviation  $\times 100$ ) contributed the most (47%) in all three models, as shown in (S7–S9 Figs). The GLM and MaxEnt models showed that *B. pfeifferi* prefers a climate with more variability in temperature throughout the year. As a result, the snail is provided with the temperature fluctuations it needs to thrive [65]. Based on GLM and MaxEnt, bio4 accounts for 46.9% of *B. pfeifferi*'s suitability. The response curves for bio12 and bio16 show that *Biom. pfeifferi* do not favour moderate to high rainfall (Fig 7). Manyangadze et al. [21] studied schistosomiasis in the Ndumo area of the uMkhanyakude district and found that *B. pfeifferi* were suitable in the cold and dry seasons (winter) following the rainy season. Moodley [65] concluded that *B. pfeifferi* was influenced by winter minimum temperatures. Christensen et al. [72] found similar results, in which *B. pfeifferi* bred extensively following rainy seasons. It was found that bio18 accounted for 44.8% of snail suitability. A study in Ethiopia [73] showed that moderate rainfall is instrumental in increasing schistosomiasis by accumulating sufficient surface water in

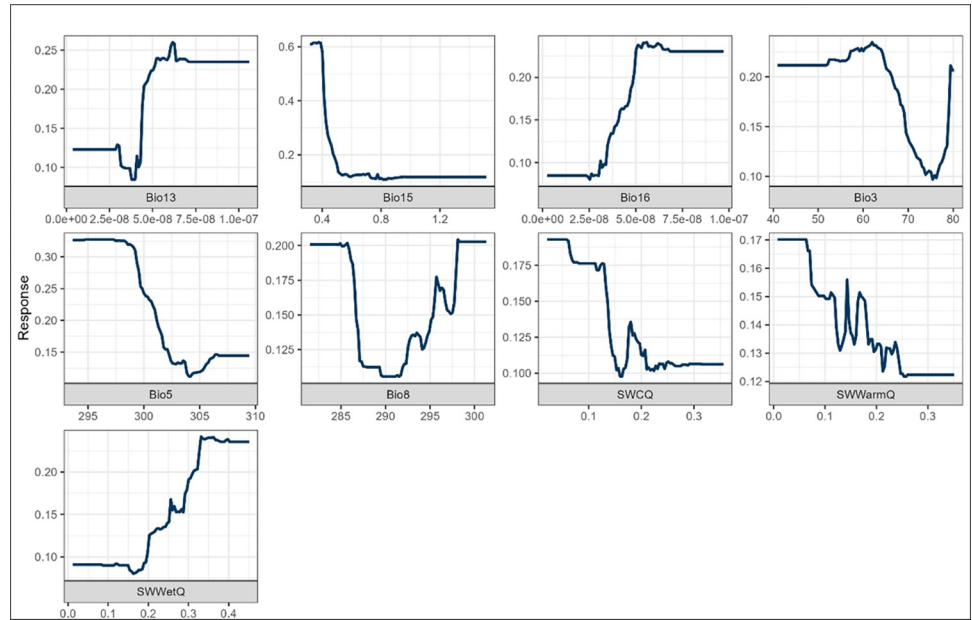

**Fig 5. Response curves for *B. africanus* against bioclimatic variables.** (Bio13  $\text{ms}^{-1}$ , Bio15%, Bio16  $\text{ms}^{-1}$ , Bio3%, Bio5 K, Bio8 K) and soil variables (SWCQ  $\text{m}^3 \text{m}^{-3}$ - Soil water for the coldest quarter, SWWarmQ  $\text{m}^3 \text{m}^{-3}$ - Soil water for the warmest quarter and SWWetQ  $\text{m}^3 \text{m}^{-3}$ - Soil water for the wettest quarter).

<https://doi.org/10.1371/journal.pone.0295149.g005>

ponds. During heavy rainfall events, water levels rise, causing water turbulence. As a result, flow rates may increase, disrupting snail habitats and reducing cercariae survival [73]. The response curve for bio8 shows that *B. pfeifferi* favours temperatures higher than 290K (16.8C°) (Fig 7). The RF model also showed that bio4 (22.9%) and bio8 (15.5%) were the highest

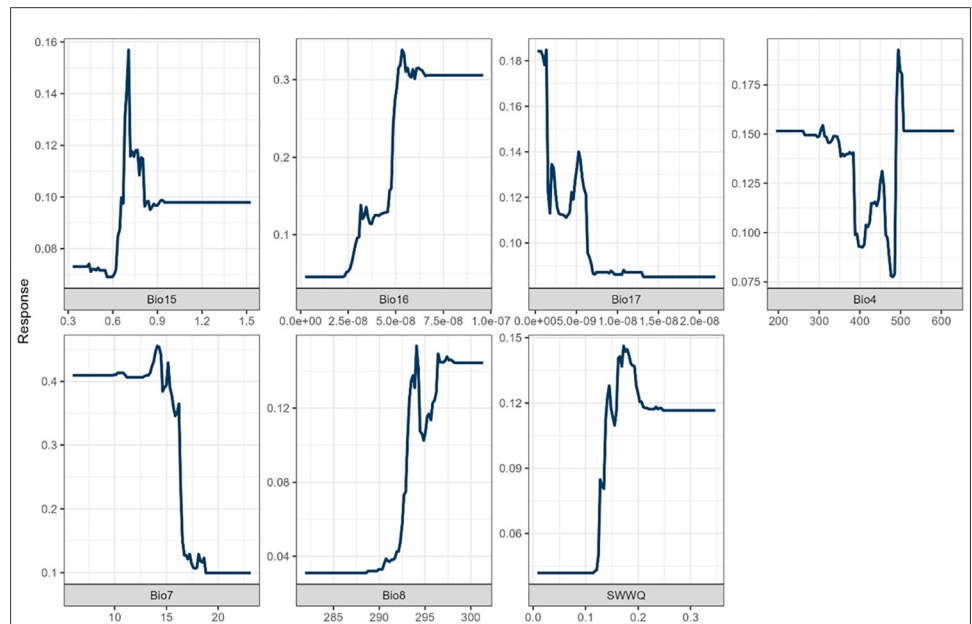

**Fig 6. Response curves for *B. globosus* against bioclimatic variables.** (Bio15%, Bio16  $\text{ms}^{-1}$ , Bio17  $\text{ms}^{-1}$ , Bio4 K, Bio7 K, Bio8 K, and soil variables SWWQ  $\text{m}^3 \text{m}^{-3}$ - Soil water for the wettest quarter).

<https://doi.org/10.1371/journal.pone.0295149.g006>

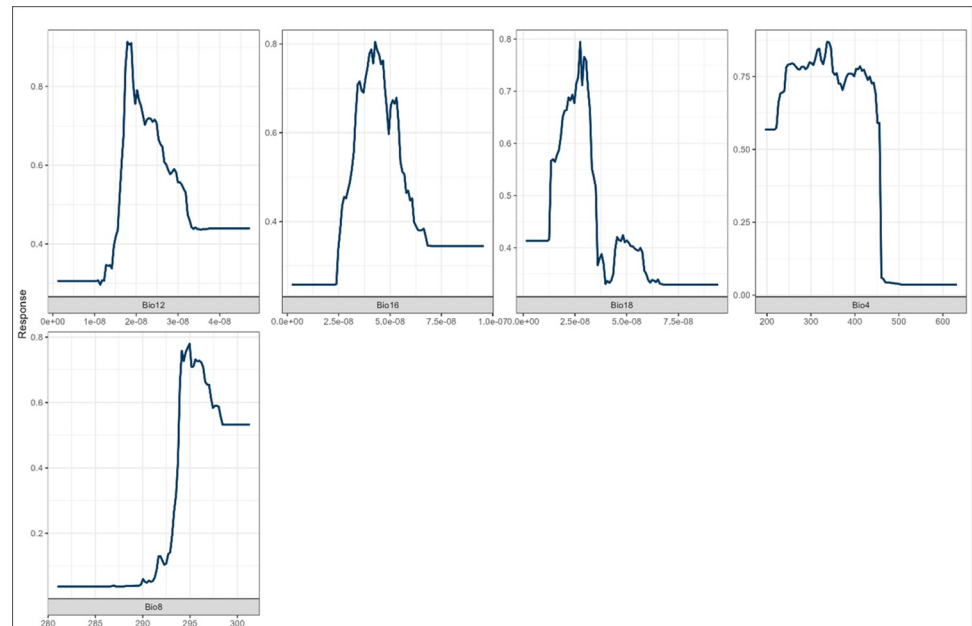

**Fig 7. Response curves for *B. pfeifferi* against bioclimatic variables.** (Bio12  $\text{ms}^{-1}$ , Bio16  $\text{ms}^{-1}$ , Bio18  $\text{ms}^{-1}$ , Bio4 K and Bio8 K).

<https://doi.org/10.1371/journal.pone.0295149.g007>

predictors of this snail's suitability. This is because bio4 and bio8 help determine the climate conditions the snail prefers. Bio4 is an influential factor affecting *B. pfeifferi*'s climate suitability. In SA, *B. pfeifferi* is marginally suited to the climate because of variations in night and day temperatures and high daytime temperatures ( $30^{\circ}\text{C}$ ). There was a notable difference in temperature tolerance for *B. pfeifferi* compared to *B. globosus*. It is pertinent to note that despite being widely distributed throughout the country, *B. pfeifferi* snails are not tolerant of high temperatures [24]. Furthermore, a study by Sturrock [74] showed that *B. pfeifferi* mortality was high at  $32^{\circ}\text{C}$ . In addition, Deka [1] and Young [52] found that bio3 and bio4 had a higher relative contribution to modelling *Biomphalaria straminea* distribution. This might be because *B. pfeifferi* and *B. straminea* belong to the same genus, suggesting these species are likely affected or influenced by similar environmental factors. Studies by McCresh et al. [41, 42] have shown that seasons are integral to schistosomiasis distribution and transmission.

### Ecological niche models

The ecological models are reasonably accurate at predicting the distribution of intermediate hosts based on bioclimatic variables. Precipitation and temperature are known factors in the development of intermediate snail hosts. Climate variability is integral to determining geographical distributions and is expected to alter species patterns [75]. According to the results, temperature and rainfall can influence the distribution of schistosomiasis in SA. The results of this study were supported by [65]. Figs 8–10 illustrate the results for the three chosen ENMs. Red shows highly suitable areas, whereas yellow depicts moderately suited locations. Green shows areas that are not suitable for schistosomiasis transmission. Additionally, snail presence probability varied with location, indicating the varying suitability of sites for *B. pfeifferi*, *B. globosus*, and *B. africanus*.

*Bulinus africanus* was distributed in the eastern part of Gauteng province, parts of Mpumalanga and the North West Province (Fig 8). *Bulinus africanus* was found to be widespread west

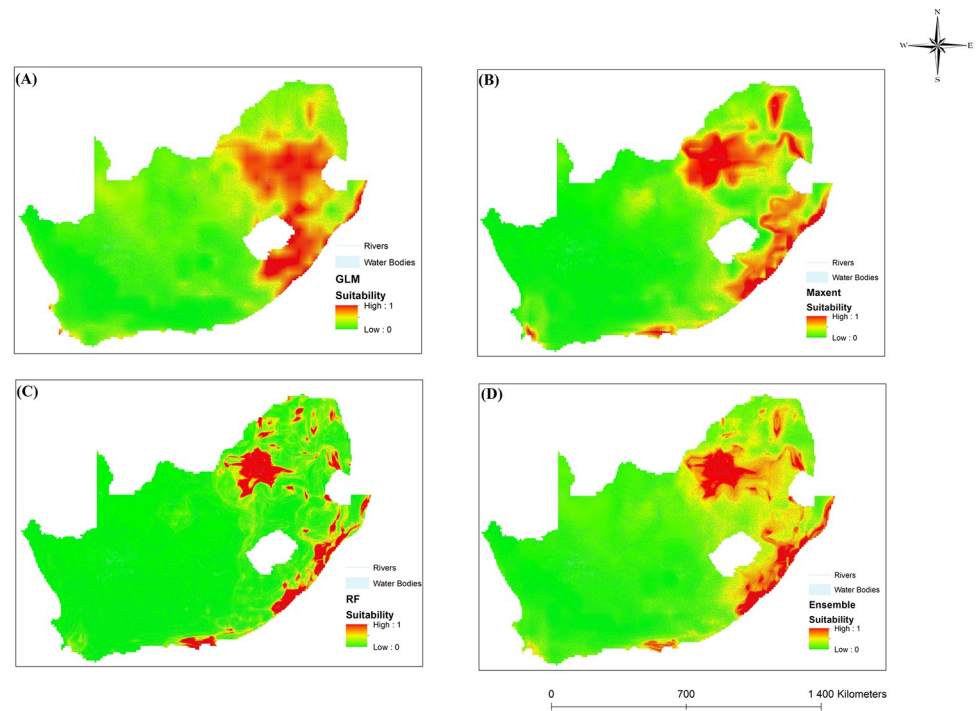

**Fig 8.** Areas where bioclimatic variables favour *B. africanus* distribution in South Africa using four different models, namely (A) GLM, (B) MaxEnt, (C) RF and (D) Ensemble.

<https://doi.org/10.1371/journal.pone.0295149.g008>

of the Eastern Cape province. *Bulinus africanus* is better adapted to colonising cooler environments and cannot tolerate high temperatures [65]. The mortality of intermediate hosts may be due to temperature increases [23]. This is likely due to the species' tolerance of extreme environments and adaptability to environmental changes [65, 76]. *Bulinus africanus* can survive in areas with temperatures (of 15° to 30°C) and moderate rainfall, making it well-suited to its distribution range. The GLM, MaxEnt and the ensemble model showed that parts of the Western Cape were suitable for transmitting schistosomiasis (Fig 8). Even though ecological models predict suitable precipitation and temperatures for the Western Cape, no disease occurs under these conditions. Appleton [77] concluded that the natural acidity of waterbodies such as rivers and dams in this province could negatively affect intermediate hosts.

Fig 9 shows that *B. globosus* is distributed in the eastern areas of SA, particularly in the Limpopo, Mpumalanga, Gauteng, and eastern regions of the North West Province. The distribution extends to the coastal areas in KwaZulu-Natal. It is likely because *B. globosus* requires hotter temperatures and moderate rainfall [65]. *Bulinus africanus* was commonly found in the eastern regions of SA and to the south of Humansdorp. *Bulinus globosus* and *Bul. africanus* is sensitive to dry conditions and is closely related to temperature [23]. The *Bulinus* group is influenced by temperature and water flow [78]. Most *B. africanus* individuals were found at lower temperatures than *B. globosus*. This may be because *B. africanus* thrives in cooler climates [77, 79]. With increasing temperatures, *Bul. globosus* is more likely to survive than *B. africanus* [80]. In this way, *B. africanus* species can colonise habitats on the highveld of SA and Gauteng. Parts of the Western Cape also have suitable environments for transmitting schistosomiasis (Fig 9). The GLM shows Cape Town to be ideal for schistosomiasis transmission, while MaxEnt, RF, and ensemble indicate the southern Western Cape as moderate suitability. Despite the favourable climate conditions for schistosomiasis, it does not occur in parts of the

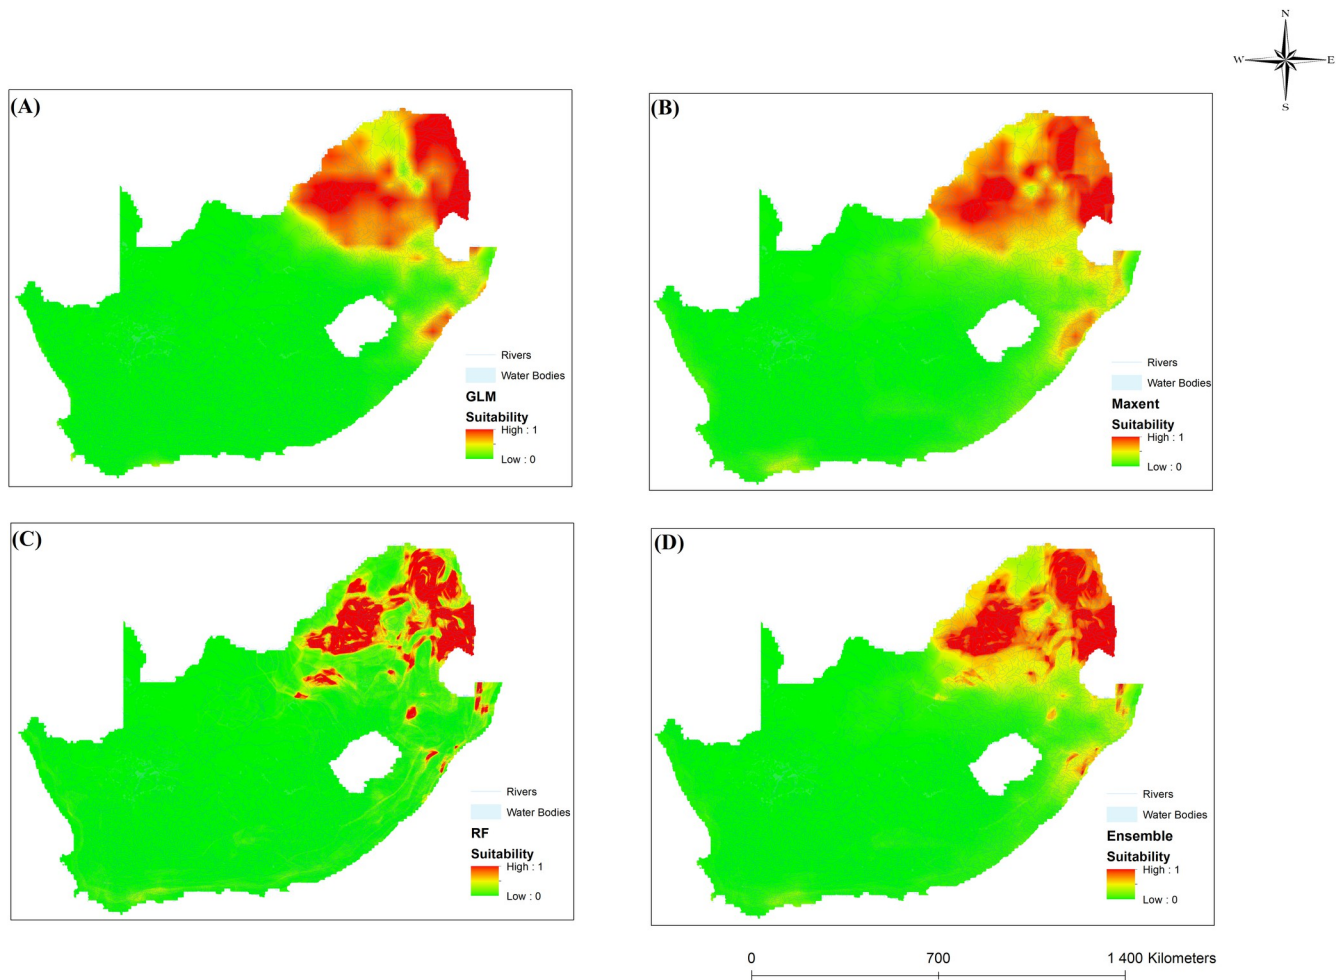

**Fig 9.** Areas where bioclimatic variables favour *B. globosus* distribution in South Africa using four different models, namely (A) GLM, (B) MaxEnt, (C) RF and (D) Ensemble.

<https://doi.org/10.1371/journal.pone.0295149.g009>

Western Cape, likely due to high salinity and acidity levels in rivers and dams of the province [76].

It was found that *B. pfeifferi* was more abundant and distributed spatially across SA than *B. africanus* and *B. globosus*. Hence, most *B. pfeifferi* observations were found across SA. The spatial distribution of *B. pfeifferi* is like that of *B. globosus*. *B. pfeifferi* can be seen distributed in the northern and coastal areas of Kwa-Zulu Natal and around the coast of the Eastern Cape (Fig 10). The distribution covers most of Gauteng, Limpopo and Mpumalanga. *B. pfeifferi* preferred warmer temperatures with average rainfall [72]. As a result, *B. pfeifferi* and *B. globosus* are characterised by similar temperatures and rainfall patterns in the same regions. The differences in *B. globosus* and *B. pfeifferi*'s distribution are due to the required rainfall and temperature thresholds these species can tolerate. *Bulinus globosus* prefers high temperatures, whereas *B. pfeifferi* prefers warmer temperatures and is found in post-rainy seasons [65].

Fig 10 illustrates that the Northern Cape has an increased potential for transmitting schistosomiasis, such as the Kgalagadi Transfrontier Park. This could be due to the ideal temperature and rainfall conditions for intermediate hosts in this region. However, no snail vectors were found or sampled in the Northern Cape. Moodley [65] concluded that no disease occurred in the Northern Cape, but the temperature in the province was suitable for schistosomiasis.

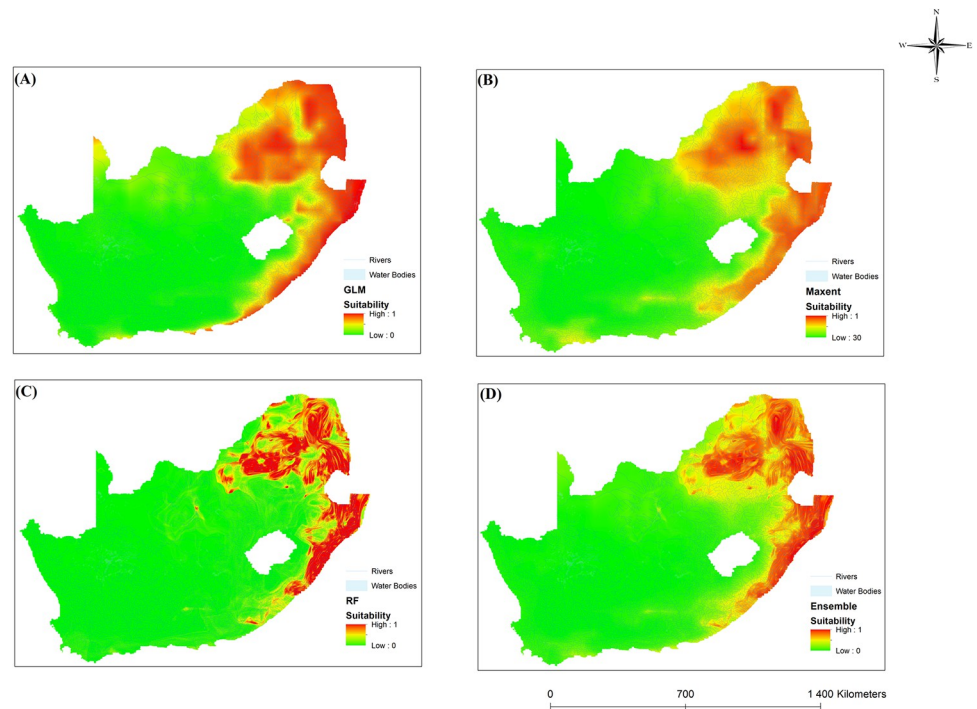

**Fig 10.** Areas where bioclimatic variables favour *B. pfeifferi* distribution in South Africa using four different models, namely (A) GLM, (B) MaxEnt, (C) RF and (D) Ensemble.

<https://doi.org/10.1371/journal.pone.0295149.g010>

In our study, ensemble models perform better than individual ENM models, as reported in other ecological studies. In the United States, ensemble models found potential habitats for three types of fish [81]. According to the ensemble models created in the present study, the most suitable areas for *B. africanus*, *B. globosus* and *B. pfeifferi* were found in the eastern and coastal regions of SA. The most suitable areas were the tropical and rural areas of SA, also located close to freshwater bodies. These findings agree with those reported in [81] regarding high schistosomiasis infection rates in villages near lakes. Results from ENM showed that temperature and precipitation were essential factors in snail distribution. This finding agrees with [73] that reported variations in rainfall and temperature could affect schistosomiasis transmission.

Based on our study, we found that temperature and rainfall can have an impact on the distribution of schistosomiasis in SA. Therefore, climate variability may influence the distribution of schistosomiasis in the future. This means climate change can affect schistosomiasis transmission, leading to shifts in the distribution of infected snails. If temperatures and precipitation levels change significantly, the geographical distribution and severity of schistosomiasis outbreaks could change.

## Conclusions

The present study aimed to use ENM to model the historical distribution of *B. africanus*, *B. globosus* and *B. pfeifferi*. Results showed that the ensemble models achieved the highest AUC scores (0.99) than the GLM, MaxEnt and RF. The ENM models showed that the distribution of *B. africanus* was found in the eastern and northern parts of Gauteng province, Mpumalanga, and the North West Province. *Bulinus africanus* species cannot tolerate high temperatures, and temperature increases could lead to the mortality of these intermediate hosts. *Bulinus*

*globosus* was found in the northeastern areas of SA, particularly in the Limpopo, Mpumalanga, and Gauteng provinces and eastern regions of the North West Province. The distribution extended to KwaZulu Natal's coastal areas with tropical and subtropical climates. This is likely because *B. globosus* requires warm temperatures and moderate rainfall. The spatial distribution of *B. pfeifferi* was similar to *Bul. globosus*, where *B. pfeifferi* was distributed in the northern and coastal areas of KwaZulu Natal province, extending to the coast of the Eastern Cape. The distribution covered most of Gauteng, Limpopo and Mpumalanga.

Although no schistosomiasis-transmitting snails are known to occur in the Western Cape due to the natural acidity of waterbodies that could negatively affect intermediate hosts, the ENM models showed a shift in the south and southwest regions of the Western Cape. This was likely due to the ideal temperature and rainfall conditions deemed suitable for schistosomiasis transmission in this province. Climate change/variability may lead to an end to schistosomiasis in SA and requires future research. The results from this study can be used to identify additional sites where *Schistosoma*-transmitting snails may already exist but have yet to be discovered. In addition, it is possible to identify future areas where the disease is likely to spread. This study contributes to the current understanding of schistosomiasis distribution in SA. The article updates the historical distribution of *Schistosoma haematobium* and *Schistosoma mansoni*.

## Supporting information

**S1 Fig. Relative variable importance for *B. africanus* using the GLM model.**

(PNG)

**S2 Fig. Relative variable importance for *B. africanus* using the MaxEnt model.**

(PNG)

**S3 Fig. Relative variable importance for *B. africanus* using the RF model.**

(PNG)

**S4 Fig. Relative variable importance for *B. globosus* using the GLM model.**

(PNG)

**S5 Fig. Relative variable importance for *B. globosus* using the MaxEnt model.**

(PNG)

**S6 Fig. Relative variable importance for *B. globosus* using the RF model.**

(PNG)

**S7 Fig. Relative variable importance for *B. pfeifferi* using the GLM model.**

(PNG)

**S8 Fig. Relative variable importance for *B. pfeifferi* using the MaxEnt model.**

(PNG)

**S9 Fig. Relative variable importance for *B. pfeifferi* using the RF model.**

(PNG)

## Author Contributions

**Conceptualization:** Nisa Ayob, Roelof P. Burger, Dirk P. Cilliers.

**Data curation:** Nisa Ayob, Henno Havenga.

**Formal analysis:** Nisa Ayob, Roelof P. Burger, Monray D. Belelie, Ncobile C. Nkosi, Henno Havenga, Dirk P. Cilliers.

**Funding acquisition:** Lizaan de Necker.

**Methodology:** Nisa Ayob, Roelof P. Burger, Dirk P. Cilliers.

**Software:** Nisa Ayob, Monray D. Belelie.

**Supervision:** Roelof P. Burger, Dirk P. Cilliers.

**Visualization:** Nisa Ayob, Ncobile C. Nkosi.

**Writing – original draft:** Nisa Ayob.

**Writing – review & editing:** Nisa Ayob, Roelof P. Burger, Monray D. Belelie, Ncobile C. Nkosi, Lizaan de Necker, Dirk P. Cilliers.

## References

1. Deka MA. Predictive risk mapping of schistosomiasis in Madagascar using ecological niche modeling and precision mapping. *Tropical Medicine and Infectious Disease*. 2022; 7(2):1–17. <https://doi.org/10.3390/tropicalmed7020015> PMID: 35202211
2. Savioli L, Daumerie D. Accelerating Work to Overcome the Global Impact of Neglected Tropical Diseases. Geneva, Switzerland: World Health Organization; 2012.
3. Gundamaraju R. Novel antipathy for schistosomiasis—the most lethal ailment of the tropical region. *Asian Pacific Journal of Tropical Biomedicine*. 2014; 4:43–45. <https://doi.org/10.12980/APJTB.4.2014C831> PMID: 25183124
4. De Leo GA, Stensgaard A-S, Sokolow SH, N'Goran EK, Chamberlin AJ, Yang G-J, et al. Schistosomiasis and climate change. *Schistosomiasis and climate change*. *BMJ*. 2020; 1–8. <https://doi.org/10.1136/bmj4324> PMID: PMC7668313.
5. Schistosomiasis [Internet]. World Health Organization. World Health Organization; [cited 2023 Feb 6]. Available from: <https://www.who.int/news-room/fact-sheets/detail/schistosomiasis>.
6. Sady H, Al-Mekhlafi HM, Webster BL, Ngui R, Atroosh WM, Al-Delaimy AK, et al. New insights into the genetic diversity of *Schistosoma mansoni* and *S. haematobium* in Yemen. *Parasites & Vectors*. 2015; 8(1):1–14.
7. Hove J, D'Ambruso L, Mabetha D, Van der Merwe M, Byass P, Kahn K, et al. 'Water is life': developing community participation for clean water in rural South Africa. *BMJ Global Health*. 2019; 4(3):1–13. <https://doi.org/10.1136/bmjgh-2018-001377> PMID: 31263583
8. Madsen H, Bloch P, Makaula P, Phiri H, Furu P, Stauffer JR. Schistosomiasis in Lake Malaŵi Villages. *EcoHealth*. 2011; 8(2):163–76.
9. Mbabazi PS, Andan O, Fitzgerald DW, Chitsulo L, Engels D, Downs JA. Examining the Relationship between Urogenital Schistosomiasis and HIV Infection. *PLoS Neglected Tropical Diseases*. 2011; 5(12):1–8. <https://doi.org/10.1371/journal.pntd.0001396> PMID: 22163056
10. Saathoff E, Olsen A, Magnussen P, Kvalsvig JD, Becker W, Appleton CC. Patterns of *Schistosoma haematobium* infection, impact of praziquantel treatment and re-infection after treatment in a cohort of schoolchildren from rural KwaZulu-Natal/South Africa. *BMC Infectious Diseases*. 2004; 4(1):1–10.
11. De Kock K, Wolmarans C, Borman M. Distribution and habitats of *Biomphalaria pfeifferi*, snail intermediate host of *Schistosoma mansoni*, in South Africa. *Water SA*. 2004; 30(1):29–36.
12. Gear GJH, Pitchford RJ, Van Eede VEJ. Atlas of Bilharzia in Southern Africa = Atlas Van Bilharzia in Suidelike Afrika. AFR. Johannesburg: South African Institute for Medical Research; 1980.
13. Appleton CC, Naidoo I. Why did schistosomiasis disappear from the southern part of the Eastern Cape? *South African Journal of Science*. 2012; 108(1):1–11.
14. Magaisa K, Taylor M, Kjetland EF, Naidoo PJ. review of the control of schistosomiasis in South Africa. *South African Journal of Science*. 2018; 111(11):1–6.
15. Stensgaard A-S, Vounatsou P, Sengupta ME, Utzinger J. Schistosomes, snails and climate change: Current trends and future expectations. *Acta Tropica*. 2019; 190:257–68. <https://doi.org/10.1016/j.actatropica.2018.09.013> PMID: 30261186
16. Adekiya TA, Aruleba RT, Oyinloye BE, Okosun KO, Kappo AP. The Effect of Climate Change and the Snail-Schistosome Cycle in Transmission and Bio-Control of Schistosomiasis in Sub-Saharan Africa.

- International Journal of Environmental Research and Public Health. 2019; 17(1):181–201. <https://doi.org/10.3390/ijerph17010181> PMID: 31887979
17. Stocker T. Climate Change 2013: The Physical Science Basis. Cambridge University Press; 2014.
  18. Stensgaard A-S, Utzinger J, Vounatsou P, Hürlimann E, Schur N, Saarnak CF, et al. Large-scale determinants of intestinal schistosomiasis and intermediate host snail distribution across Africa: does climate matter? *Acta Tropica*. 2013; 128(2):378–90. <https://doi.org/10.1016/j.actatropica.2011.11.010> PMID: 22142789
  19. Monde C, Syampungani S, Van den Brink PJ. Natural and human induced factors influencing the abundance of *Schistosoma* host snails in Zambia. *Environmental Monitoring and Assessment*. 2016; 188(6):1–14. <https://doi.org/10.1007/s10661-016-5351-y> PMID: 27230422
  20. Gautret P, Mockenhaupt FP, Von Sonnenburg F, Rothe C, Libman M, Van De Winkel K, et al. Local and International Implications of Schistosomiasis Acquired in Corsica, France. *Emerging Infectious Diseases*. 2015; 21(10):1865–1868. <https://doi.org/10.3201/eid2110.150881> PMID: 26401954
  21. Manyangadze T, Chimbari MJ, Gebreslasie M, Ceccato P, Mukaratirwa S. Modelling the spatial and seasonal distribution of suitable habitats of schistosomiasis intermediate host snails using Maxent in Ndumo area, KwaZulu-Natal Province, South Africa. *Parasites & Vectors*. 2016; 9(1):2–10. <https://doi.org/10.1186/s13071-016-1834-5> PMID: 27814746
  22. Shiff C.J. The influence of temperature on the vertical movement of *Bulinus (Physopsis) globosus* in the laboratory and the field. *South African Journal of Science*. 1966; 62:210–220.
  23. De Kock KN, Wolmarans CT. Distribution and habitats of the *Bulinus africanus* species group, snail intermediate hosts of *Schistosoma haematobium* and *S. mattheei* in South Africa. *Water SA*. 2005; 31:11725.
  24. Brown DS. Freshwater Snails Of Africa And Their Medical Importance. CRC Press; 2002.
  25. Phillips SJ, Anderson RP, Schapire RE. Maximum entropy modelling of species geographic distributions. *Ecological Modelling*. 2006; 190:231–259.
  26. Guo WY, Lambertini C, Li XZ, Meyerson LA, Brix H. Invasion of Old World *Phragmites australis* in the New World: precipitation and temperature patterns combined with human influences redesign the invasive niche. *Global Change Biology*. 2013; 19(11):3406–3422. <https://doi.org/10.1111/gcb.12295> PMID: 23765641
  27. Carlson CJ, Dougherty ER, Getz W. An Ecological Assessment of the Pandemic Threat of Zika Virus. *PLOS Neglected Tropical Diseases*. 2016; 10(8). <https://doi.org/10.1371/journal.pntd.0004968> PMID: 27564232
  28. Yang Y, Cheng W, Wu X, Huang S, Deng Z, Zeng X, et al. Prediction of the potential global distribution for *Biomphalaria straminea*, an intermediate host for *Schistosoma mansoni*. *PLOS Neglected Tropical Diseases*. 2018; 12(5):6548–6562.
  29. Mainali KP, Warren DL, Dhileepan K, McConnachie A, Strathie L, Hassan G, et al. Projecting future expansion of invasive species: comparing and improving methodologies for species distribution modeling. *Global Change Biology*. 2015; 21(12):4464–80 <https://doi.org/10.1111/gcb.13038> PMID: 26185104
  30. Sanderson EW, Jaiteh M, Levy MA, Redford KH, Wannebo AV, Woolmer G. The human footprint and the last of the wild. *Bioscience*. 2002; 52(10):891–904.
  31. Manyangadze T, Chimbari MJ, Gebreslasie M, Ceccato P, Mukaratirwa S. Modelling the spatial and seasonal distribution of suitable habitats of schistosomiasis intermediate host snails using Maxent in Ndumo area, KwaZulu-Natal Province, South Africa. *Parasites & Vectors*. 2016; 9(1):572–582. <https://doi.org/10.1186/s13071-016-1834-5> PMID: 27814746
  32. Poulos H, Chernoff B, Fuller P, Butman D. Ensemble forecasting of potential habitat for three invasive fishes. *Aquatic Invasions*. 2012; 7(1):59–72.
  33. Araujo MB, Pearson RG, Thuiller W, Erhard M. Validation of species-climate impact models under climate change. *Global Change Biology*. 2005; 11(9):1504–13.
  34. Beaumont LJ, Graham E, Duursma DE, Wilson PD, Cabrelli A, Baumgartner JB, et al. Which species distribution models are more (or less) likely to project broad-scale, climate-induced shifts in species ranges? *Ecological Modelling*. 2016; 342:135–46.
  35. Mutuku MW, Dweni CK, Mwangi M, Kinuthia JM, Mwangi IN, Maina GM, et al. Field-derived *Schistosoma mansoni* and *Biomphalaria pfeifferi* in Kenya: a compatible association characterised by lack of strong local adaptation, and presence of some snails able to persistently produce cercariae for over a year. *Parasites & Vectors*. 2014; 7(1):533–541.
  36. Tibane E, Lentsoane N, editors. South Africa Yearbook [Internet]. 23rd ed. Pretoria: Government Communications (GCIS); 2016. Available from: [https://www.southafrica-usa.net/consulate/Yearbook\\_2016/SAYB1516.pdf](https://www.southafrica-usa.net/consulate/Yearbook_2016/SAYB1516.pdf).
  37. Climate Risk Profile: South Africa: The World Bank Group. 2021.

38. Ge JH, Zhang SQ, Wang TP, Zhang G, Tao C, Lu D, et al. Effects of flood on the prevalence of schistosomiasis in Anhui province in 1998. *Journal of Tropical Diseases and Parasitology*. 2004; 2:131–134.
39. Longxing Q, Cui J, Huang T, Ye F, Jiang L. Mathematical Model of Schistosomiasis under Flood in Anhui Province. *Abstract and Applied Analysis*. 2014;(4):1–7.
40. Ziervogel G, New M, Van Garderen EA, Midgley G, Taylor A, Hamann R, et al. Climate change impacts and adaptation in South Africa". *Wiley Interdisciplinary Reviews: Climate Change*. 2014; 5(5):605–620.
41. McCreesh N, Arinaitwe M, Arineitwe W, Tukahebwa EM, Booth M. Effect of water temperature and population density on the population dynamics of *Schistosoma mansoni* intermediate host snails. *Parasites & Vectors*. 2014; 7(1):1–9.
42. McCreesh N, Nikulin G, Booth M. Predicting the effects of climate change on *Schistosoma mansoni* transmission in eastern Africa. *Parasites & Vectors*. 2015; 8(1):42–49.
43. Tshiala MF. Analysis of temperature trends over Limpopo province, South Africa". *Journal of Geography and Geology*. 2011; 3(1):13–21.
44. Chatterjee S, Hadi A. *Regression Analysis by Example*. 5th ed. Hoboken: Wiley-Blackwell; 2015
45. Madzwamuse M. Drowning voices the climate change discourse in South Africa. *Policy Brief*. 2010; 5(8):1–8.
46. Hastie T, Tibshirani R, Friedman JH. *The Elements of Statistical Learning*. 2009. Springer Series in Statistics.
47. Valavi R, Guillera-Aroita G, Lahoz-Monfort JJ, Elith J. Predictive performance of presence-only species distribution models: a benchmark study with reproducible code. *Ecological Monographs*. 2022; 92(1):1–27.
48. Strobl C, Malley J, Tutz G. An introduction to recursive partitioning: Rationale, application, and characteristics of classification and regression trees, bagging, and random forests. *Psychological Methods*. 2009; 14:323–334. <https://doi.org/10.1037/a0016973> PMID: 19968396
49. Naimi B, Araújo MB. sdm: a reproducible and extensible R platform for species distribution modelling. *Ecography*. 2016; 39(4):368–375.
50. Zuza EJ, Maseyk K, Bhagwat SA, De Sousa K, Emmott A, Rawes W, et al. Climate suitability predictions for the cultivation of macadamia (*Macadamia integrifolia*) in Malawi using climate change scenarios. *PLOS ONE*. 2021; 16(9):1–20. <https://doi.org/10.1371/journal.pone.0257007> PMID: 34499683
51. Merow C, Smith MJ, Silander JA Jr. A practical guide to MaxEnt for modelling species' distributions: what it does, and why inputs and settings matter. *Ecography*. 2013; 36(10):1058–1069.
52. Young N, Carter L, Evangelista P. *A MaxEnt Model v3.3.3e Tutorial (ArcGIS v10)*. Natural Resource Ecology. USA; 2011.
53. Allouche O, Tsoar A, Kadmon R. Assessing the accuracy of species distribution models: prevalence, kappa and the true skill statistic (TSS). *Journal of Applied Ecology*. 2006; 43(6):1223–1232.
54. Anderson RM, May RM. Prevalence of schistosome infections within molluscan populations: observed patterns and theoretical predictions. *Parasitology*. 1979; 79(1):63–4. <https://doi.org/10.1017/s003118200051982> PMID: 542322
55. Wouyou HG, Lokonon BE, Idohou R, Zossou-Akete AG, Assogbadjo AE, Glèlè Kakaï R. Predicting the potential impacts of climate change on the endangered *Caesalpinia bonduc* (L.) Roxb in Benin (West Africa). *Heliyon*. 2022; 8(3). <https://doi.org/10.1016/j.heliyon.2022.e09022> PMID: 35252617
56. Mushi V, Zacharia A, Shao M, Mubi M, Tarimo D. Prevalence and risk factors of urogenital schistosomiasis among under-fives in Mtama District in the Lindi region of Tanzania. *PLOS Neglected Tropical Diseases*. 2022; 16(4):1–23. <https://doi.org/10.1371/journal.pntd.0010381> PMID: 35442997
57. Kaky E, Nolan V, Alatawi A, Gilbert F. A comparison between Ensemble and MaxEnt species distribution modelling approaches for conservation: A case study with Egyptian medicinal plants. *Ecological Informatics*. 2020; 60:101150.
58. Wang W-C, Lo N-J, Chang W-I, Huang K-Y. Modeling spatial distribution of a rare and endangered plant species (*Brainea insignis*) in central taiwan. *The International Archives of the Photogrammetry, Remote Sensing and Spatial Information Sciences*. 2012;;241–246.
59. Abdelaal M, Fois M, Fenu G, Bacchetta G. Using MaxEnt modeling to predict the potential distribution of the endemic plant *Rosa arabica* Crép. in Egypt. *Ecological Informatics*. 2019; 50:68–75.
60. Li J, Wu J, Peng K, Fan G, Yu H, Wang W, et al. Simulating the effects of climate change across the geographical distribution of two medicinal plants in the genus *Nardostachys*. *Peer Journal*. 2019; 7:1–15. <https://doi.org/10.7717/peerj.6730> PMID: 31024763
61. Idohou R, Townsend Peterson A, Assogbadjo AE, Vihotogbe RL, Padonou E, Glèlè Kakaï R. Identification of potential areas for wild palm cultivation in the Republic of Benin through remote sensing and ecological niche modeling. *Genetic Resources and Crop Evolution*. 2016; 64(6):1383–1389.

62. Freitas CC, Guimarães RJPS, Dutra LV, Martins FT, Gouvêa EJC. Remote Sensing and Geographic Information Systems for the Study of Schistosomiasis in the State of Minas Gerais. São José dos Campos, Brazil; 2020.
63. Appleton CC. Review of literature on abiotic factors influencing the distribution and life cycles of bilharzia intermediate host snails. *Malacological Review*. 1978; 11:1–25.
64. De Kock KN, Van Eeden L. Effect of programmed circadian temperature fluctuations on population dynamics of *Biomphalaria pfeifferi* (Krauss). *South African Journal of Zoology*. 1986; 21:28–32.
65. Moodley I. Modelling Schistosomiasis in South Africa. Master of Science in the School of Life and Environmental Sciences, University of Natal, Durban, South Africa. 2003.
66. Manyangadze T, Chimbari MJ, Rubaba O, Soko W, Mukaratirwa S. Spatial and seasonal distribution of *Bulinus globosus* and *Biomphalaria pfeifferi* in Ingwavuma, uMkhanyakude district, KwaZulu-Natal, South Africa: Implications for schistosomiasis transmission at micro-geographical scale. *Parasites & Vectors*. 2021; 14(1):222–232.
67. Pennance T, Person B, Muhsin MA, Khamis AN, Muhsin J, Khamis IS, et al. Urogenital schistosomiasis transmission on Unguja Island, Zanzibar: characterisation of persistent hot-spots. *Parasites & Vectors*. 2016; 9(1):1–10. <https://doi.org/10.1186/s13071-016-1847-0> PMID: 27986092
68. Guo S-Y, Li L, Zhang L-J, Li Y-L, Li S-Z, Xu J. From the One Health Perspective: Schistosomiasis Japonica and Flooding. *Pathogens*. 2021; 10(12):1538. <https://doi.org/10.3390/pathogens10121538> PMID: 34959493
69. Qin A, Liu B, Guo Q, Bussmann RW, Ma F, Jian Z, et al. Maxent modeling for predicting impacts of climate change on the potential distribution of *Thuja sutchuenensis* Franch., an extremely endangered conifer from southwestern China. *Global Ecology and Conservation*. 2017; 10:139–46.
70. Joubert PH, Pretorius SJ, De Kock K, Van Eeden L. The effect of constant low temperatures on the survival of *Bulinus africanus* (Krauss), *Bulinus globosus* (Morelet) and *Biomphalaria pfeifferi* (Krauss). *South African Journal of Zoology*. 1984; 19:14–316.
71. Shiff CJ, Evans A, Yiannakis C, Eardley M. Seasonal influence on the production of *Schistosoma haematobium* and *S. mansoni* cercariae in Rhodesia. *International Journal of Parasitology*. 1975; 5:119–123.
72. Christensen EE, Taylor M, Zulu SG, Lillebo K, Gundersen SG, Holmen S, et al. Seasonal variations in *Schistosoma haematobium* egg excretion in school-age girls in rural KwaZulu-Natal Province, South Africa. *South African Medical Journal*. 2018; 108(4):352–362. <https://doi.org/10.7196/SAMJ.2017.v108i4.12775> PMID: 29629689
73. Xue Z, Gebremichael M, Ahmad R, Weldu ML, Bagtzoglou AC. Impact of temperature and precipitation on propagation of intestinal schistosomiasis in an irrigated region in Ethiopia: suitability of satellite datasets. *Tropical Medicine & International Health*. 2011; 16(9):1104–1111.
74. Sturrock R. Schistosomiasis epidemiology and control: how did we get here and where should we go? *Memórias do Instituto Oswaldo Cruz*. 2001; 96(1):17–27.
75. Pedersen UB, Karagiannis-Voules D-A, Midzi N, Mduluzi T, Mukaratirwa S, Fensholt R, et al. Comparison of the spatial patterns of schistosomiasis in Zimbabwe at two points in time, spaced twenty-nine years apart: is climate variability of importance? *Geospatial Health*. 2017; 12(1):55–66. <https://doi.org/10.4081/gh.2017.505> PMID: 28555471
76. Pretorius SJ, De Kock Kn, Joubert PH. Evidence that population growth of the freshwater snail *Bulinus africanus* is density limited in a natural habitat. *J Med Appl Malacol*. 1992; 4:113–120.
77. Appleton C, Stiles G. Geology and geomorphology in relation to the distribution of snail intermediate hosts of bilharzia in South Africa. *Annals of Tropical Medicine & Parasitology*. 1976; 70(2):189–198.
78. Quayle LM, Appleton CC, Dickens CW. The Impact of River Flow Regulation and Manipulation on the Invertebrate Hosts of Malaria, Bilharzia and Liver Fluke Disease. Water Research Commission. 2010.
79. Brown DS. Freshwater snails of Africa and their medical importance. London, England: Taylor & Francis; 1980.
80. Davis G.M.; Carney W.P. Description of *Oncomelania hupensis lindoensis*, first intermediate host of *Schistosoma japonicum* in Sulawesi (Celebes). In *Proceedings of the Academy of Natural Sciences of Philadelphia*; Academy of Natural Sciences: Philadelphia, PA, USA, 1973; 25:1–34.
81. Ponpetch K, Erko B, Bekana T, Kebede T, Tian D, Yang Y, et al. Environmental drivers and potential distribution of *Schistosoma mansoni* endemic areas in Ethiopia. *Microorganisms*. 2021; 9(10):2144–2151. <https://doi.org/10.3390/microorganisms9102144> PMID: 34683465
